# Supplementary material for: PbI2 band gap engineering by gel incorporation
Source: Royal Society of Chemistry journal article supplement (doi:10.1039/c7qm00509a), 2017-12-15
Supplement: c7qm00509a1.pdf [file c7qm00509a1.pdf]

## Electronic Supplementary information (ESI)

### **PbI<sub>2</sub> Band Gap Engineering by Gel Incorporation**

Chong Hu, Tao Ye, Yujing Liu, Jie Ren, Xinyi Jin, Hongzheng Chen, Hanying Li\*

*MOE Key Laboratory of Macromolecular Synthesis and Functionalization,  
State Key Laboratory of Silicon Materials, Department of Polymer Science  
and Engineering, Zhejiang University, Hangzhou, 310027 China.*

*E-mail:* [hanying\\_li@zju.edu.cn](mailto:hanying_li@zju.edu.cn)

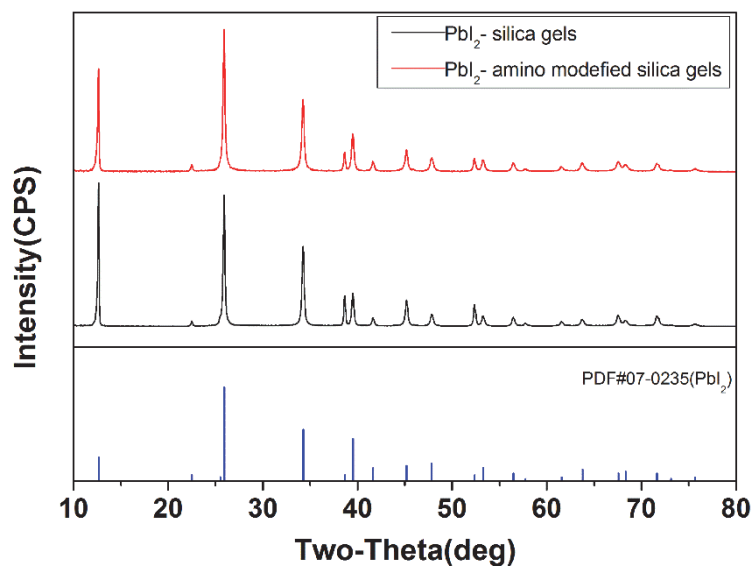

**Figure S1.** PXRD patterns of PbI<sub>2</sub> grown from 5 w/v% gel and 10 v/v% gel (5% NH<sub>2</sub>).

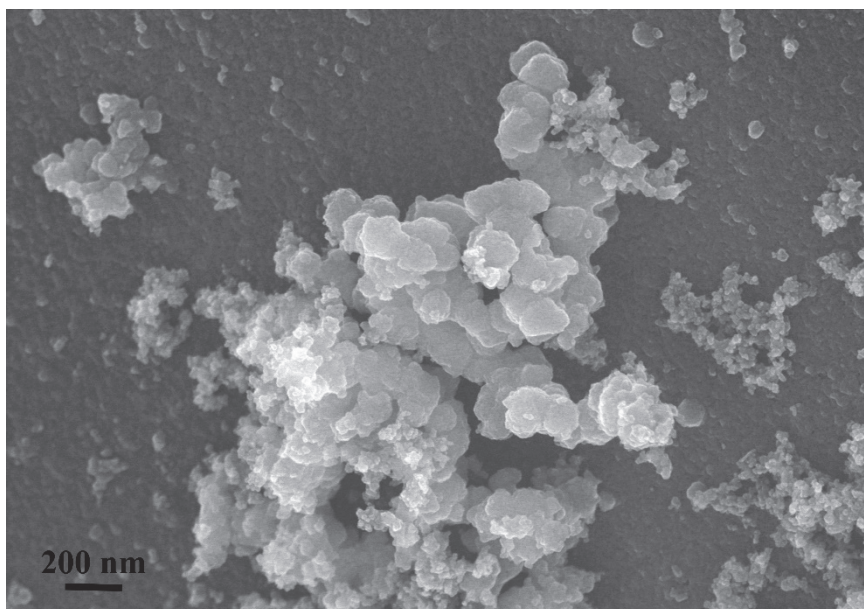

**Figure S2.** SEM image of exposed colloidal silica particles after etching PbI<sub>2</sub> single crystal grown from 5 w/v% gel.

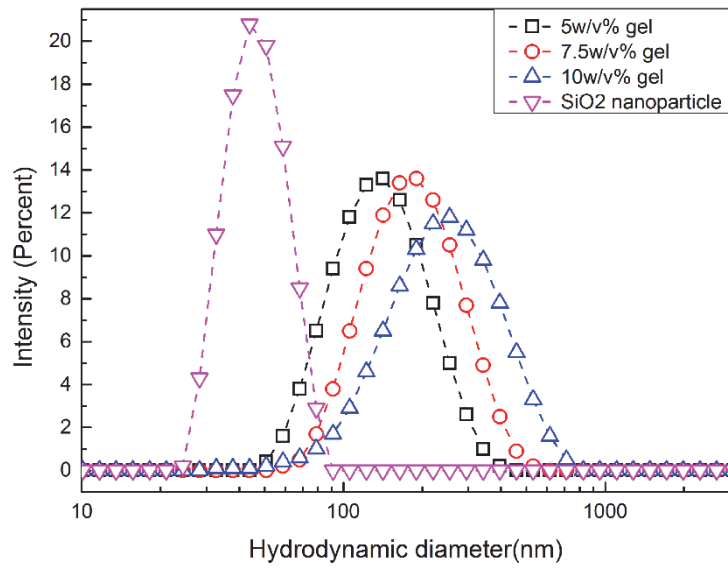

**Figure S3.** Size distribution of the purchased silica nanoparticles and the colloidal silica particles diluted from the prepared silica gels with varied gel concentrations by intensity examined by DLS.

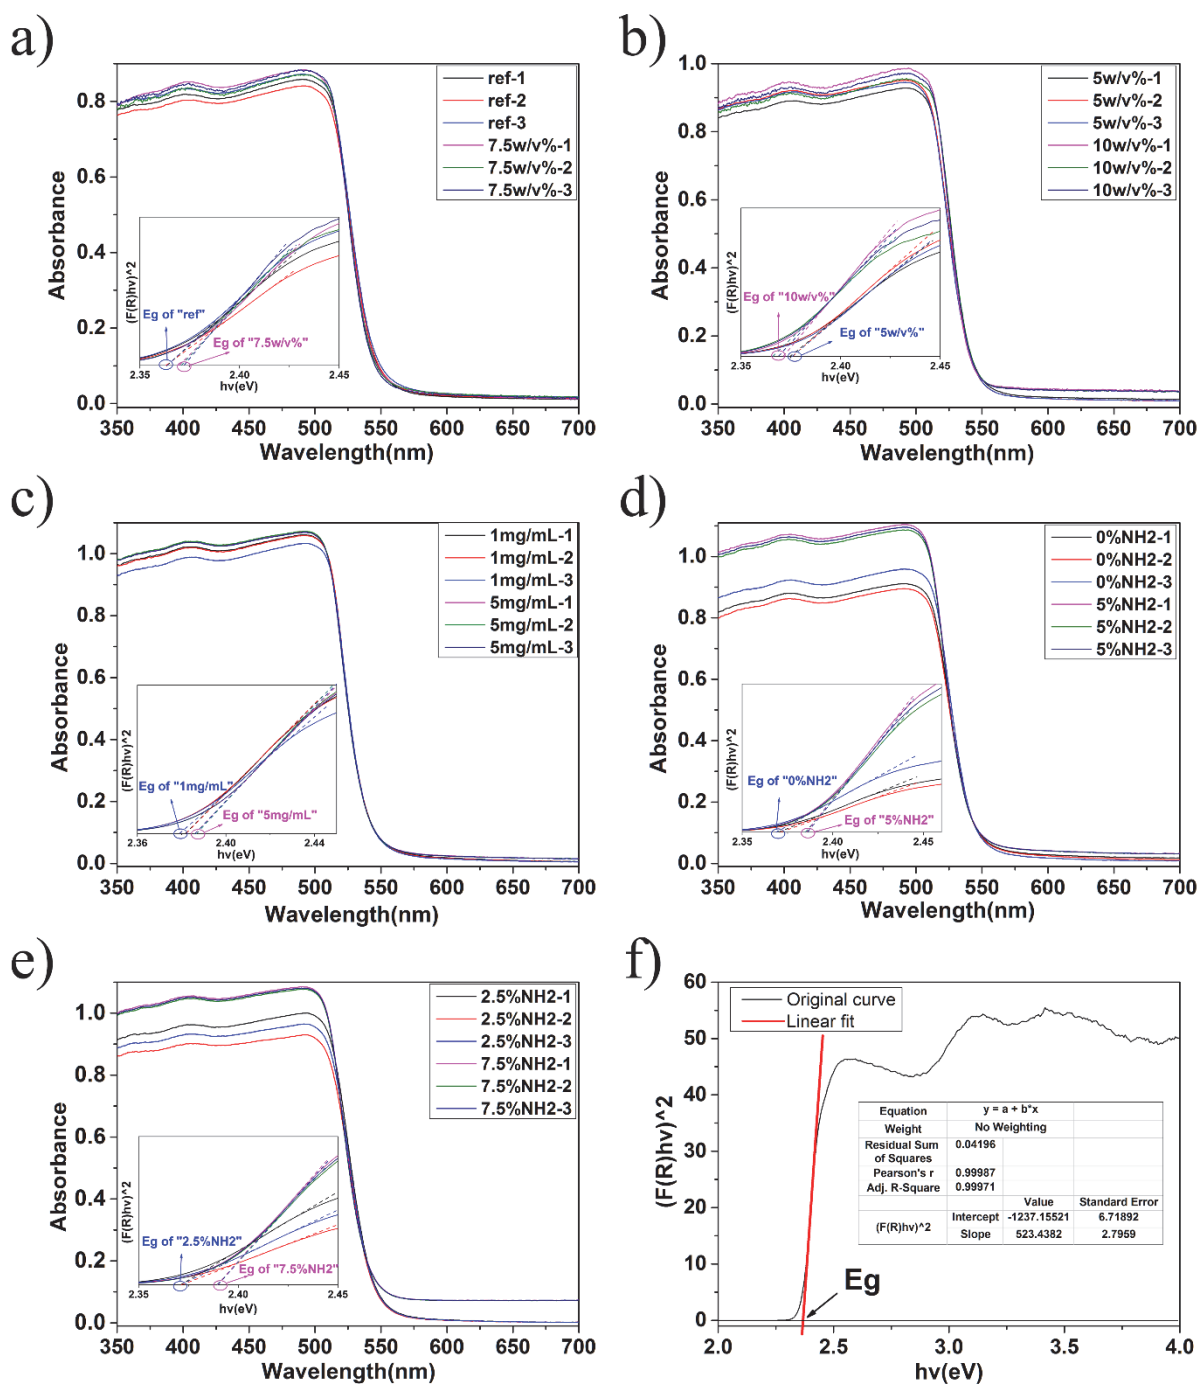

**Figure S4.** (a-e) Diffuse reflectance spectra of all the samples used in this work drawing with the original measured data. Three samples were prepared and measured for each crystallization condition. Absorbance ( $A$ ) can be converted to  $R_\infty$  by equation  $A = -\lg(R_\infty)$ . By combining Tauc equation with KM model, the  $[F(R_\infty)hv]^2$  was plotted against the  $hv$  in (f), taking the spectra of ref-1 as an example. Inset table in (f): linear fitting report. In order to reduce the mapping error, the linear fitting was performed in the linear region with Pearson's  $r \geq 0.999$ . Insets in (a-e):  $[F(R_\infty)hv]^2 - hv$  curves and corresponding fitting lines of all the samples.  $E_g$  values deduced from these curves are listed in table S3.

**Table S1.** Preparation of 10 v/v% gel from alkoxides with  $C_{NH_2}$  of 2.5%, 5% and 7.5%. The density values used for calculation: TMOS (1.023 g/ml), APTMS (1.027 g/mL),  $PbI_2$  (6.16 g/cm<sup>3</sup>).

| $C_{NH_2}$ | Solution A  |              |                | Solution B                  |                |                 |
|------------|-------------|--------------|----------------|-----------------------------|----------------|-----------------|
|            | TMOS<br>/mL | APTMS<br>/mL | Ethanol<br>/mL | $C_4H_6O_4Pb \cdot 3H_2O/g$ | Ethanol<br>/mL | DI water<br>/mL |
| 2.5%       | 8.84        | 1.16         | 80             | 1.9                         | 8              | 2               |
| 5%         | 7.74        | 2.26         | 80             | 1.9                         | 8              | 2               |
| 7.5%       | 6.63        | 3.37         | 80             | 1.9                         | 8              | 2               |

**Table S2.** Lattice parameters of referenced  $PbI_2$  and  $PbI_2$  crystals grown from silica gels with varied gel concentrations deduced by the Rietveld refinement method and lattice strains calculated compared to the referenced  $PbI_2$ .

| Sample                   | a(Å)     | c(Å)     | a-axis strain(%) | c-axis strain(%) |
|--------------------------|----------|----------|------------------|------------------|
| $PbI_2$<br>(reference)   | 4.557(2) | 6.981(2) | 0.000%           | 0.000%           |
| $PbI_2$<br>(5w/v% gel)   | 4.560(1) | 6.984(1) | 0.066%           | 0.043%           |
| $PbI_2$<br>(7.5w/v% gel) | 4.558(1) | 6.983(1) | 0.022%           | 0.029%           |
| $PbI_2$<br>(10w/v% gel)  | 4.557(1) | 6.980(1) | 0.000%           | -0.014%          |

**Table S3.**  $E_g$  values of each sample measured by DRS. Three samples were prepared and measured for each crystallization condition. The measured  $E_g$  values show good reproducibility with small standard deviation.

| Samples     | Measured $E_g$ values(eV) |                 |                 | Average $E_g$<br>value(eV) | Standard<br>Deviation(eV) |
|-------------|---------------------------|-----------------|-----------------|----------------------------|---------------------------|
|             | 1 <sup>st</sup>           | 2 <sup>nd</sup> | 3 <sup>rd</sup> |                            |                           |
| ref         | 2.364                     | 2.363           | 2.364           | 2.364                      | 0.00058                   |
| 5w/v%       | 2.375                     | 2.373           | 2.376           | 2.375                      | 0.00153                   |
| 7.5w/v%     | 2.370                     | 2.371           | 2.374           | 2.372                      | 0.00208                   |
| 10w/v%      | 2.366                     | 2.368           | 2.372           | 2.369                      | 0.00306                   |
| 1mg/mL      | 2.382                     | 2.382           | 2.379           | 2.381                      | 0.00173                   |
| 5mg/mL      | 2.386                     | 2.387           | 2.386           | 2.386                      | 0.00058                   |
| 0% $NH_2$   | 2.368                     | 2.37            | 2.371           | 2.370                      | 0.00153                   |
| 2.5% $NH_2$ | 2.372                     | 2.372           | 2.373           | 2.372                      | 0.00058                   |
| 5% $NH_2$   | 2.384                     | 2.385           | 2.386           | 2.385                      | 0.00100                   |
| 7.5% $NH_2$ | 2.389                     | 2.389           | 2.39            | 2.389                      | 0.00058                   |
